# Supplementary material for: Preparation of a series of mesoporous lanthanide oxides by a neutral supramolecular templating routeElectronic supplementary information (ESI) available: DSC results. See http://www.rsc.org/suppdata/jm/b3/b313982d/
Source: Royal Society of Chemistry journal article supplement (doi:10.1039/b313982d), 2004-01-01
Supplement: b313982d.doc [file b313982d.doc]

**a**

**a**

EXO

**b**

EXO

Differential scanning calorimetry data for (a) praseodymium-surfactant and (b) neodymium-surfactant composites heated to 500oC in oxygen.
